# Supplementary material
Source: PubMed Central journal article supplement (PMC3421209)
Supplement: 1204376109_pnas.201204376SI.pdf [file 1204376109_pnas.201204376SI.pdf]

# Supporting Information

Absalom et al. 10.1073/pnas.1204376109

## SI Materials and Methods

**Materials.** Bicuculline, diazepam, etomidate, muscimol, trazololol, 4,5,6,7-tetrahydroisoxazolo[5,4-c]pyridin-3-ol (THIP or gaboxadol), and valerenic acid were purchased from Tocris Bioscience.

**Methods. Photolinking, proteolysis, and denaturing gel electrophoresis.** Rat membrane preparations (30  $\mu$ g protein) were incubated with 100 nM [ $^{125}$ I]4-hydroxy-4-[4-(2-azido-5-iodobenzyloxy)phenyl]butanoate  $\gamma$ -hydroxybutyric acid ([ $^{125}$ I]azido-BnOPh-GHB) in the absence or presence of 100  $\mu$ M 4-hydroxy-4-[4-(2-iodobenzyloxy)phenyl]butanoate (BnOPh-GHB) (1) for 1 h (room temperature) in incubation buffer 50 mM  $\text{KH}_2\text{PO}_4$  buffer (pH 6.0). The reaction was terminated by centrifugation at 4  $^\circ\text{C}$ , and the pellet was resuspended, washed, and UV-irradiated for 2 min (302 nm, 25 W). After two additional washing steps, the pellet was resuspended and incubated in proteinase K buffer [20 mM Tris buffer (pH 8.0) containing 0.5% SDS, 1.0% Triton-X 100, 50 mM DTT, proteinase K (5 ng/ $\mu$ L)] for the indicated time points at 37  $^\circ\text{C}$ . Proteolysis was terminated by the addition of 5 mM phenylmethylsulfonylfluoride (Sigma) and 4  $\mu$ L Nupage LDS buffer sample buffer (Invitrogen). Proteins were separated on a 4–12% gradient gel (Invitrogen) along with  $^{14}\text{C}$ -methylated molecular mass markers (CFA.626; GE Healthcare). The dried gel was exposed to a BAS-2040 imaging plate (Science Imaging Scandinavia AB) for 2–5 h and scanned by phosphorimaging in a BAS-2500 bioimaging analyzer (Fujifilm). Radioactive bands were excised for liquid chromatography (LC)–MS analysis.

**Sample preparation and LC-MS analysis.** The isolated gel bands were excised, destained, and subjected to in-gel digestion by trypsin (sequencing grade; Promega) as previously described (2). The

resulting peptides were extracted in 0.5% acetic acid, concentrated on reversed-phase C18 tips, and analyzed by nanoscale LC-MS/MS on an LTQ-Orbitrap XL (Thermo Scientific) mass spectrometer using automatic lock mass recalibration (3). The peptides were separated by a linear gradient of increasing acetonitrile in 0.5% acetic acid (8–30% vol/vol) for 90 min on an Easy-nLC (Proxeon Biosystems), and the eluting peptides were directly electrosprayed into the orifice of the MS instrument. The mass spectrometer was operated in data-dependent acquisition mode to automatically switch between full-scan MS and collision-induced dissociation MS/MS. Full scans were recorded in the orbitrap mass analyzer at a resolution of 60,000 at  $m/z$  400, whereas up to 10 MS/MS spectra were analyzed by the LTQ detector system in each scan cycle.

Target values for full scans were set to  $10^6$  and  $10^4$  for collision-induced dissociation MS/MS. The spray voltage was set to 2.2 kV, the source temperature was 200  $^\circ\text{C}$ , normalized collision energy (CE) was 35%, and a lock mass from ambient air ( $m/z = 445.120024$ ) was used to recalibrate all full scans.

All raw LC-MS/MS files were processed with the MaxQuant software suite (4). Peptides were identified by searching the peak lists against a forward and reversed version of the rat and mouse IPI v.3.37 databases using Mascot ([www.matrixscience.com](http://www.matrixscience.com)), allowing the following variable modifications: oxidized methionine, N-terminal protein acetylation, and N-pyro-glutamine. The initial mass tolerance was set to 7 ppm for MS and 0.5 Da for MS/MS. Identified peptide hits were filtered to an estimated false discovery rate (FDR) < 0.01 and quantified using the label-free quantitation algorithm and spectral MS/MS counts.

1. Wellendorph P, et al. (2010) Novel radioiodinated  $\gamma$ -hydroxybutyric acid analogues for radiolabeling and Photolinking of high-affinity  $\gamma$ -hydroxybutyric acid binding sites. *J Pharmacol Exp Ther* 335:458–464.
2. Lundby A, Olsen JV (2011) GeLCMS for in-depth protein characterization and advanced analysis of proteomes. *Methods Mol Biol* 753:143–155.

3. Olsen JV, et al. (2005) Parts per million mass accuracy on an Orbitrap mass spectrometer via lock mass injection into a C-trap. *Mol Cell Proteomics* 4:2010–2021.
4. Cox J, Mann M (2008) MaxQuant enables high peptide identification rates, individualized p.p.b.-range mass accuracies and proteome-wide protein quantification. *Nat Biotechnol* 26:1367–1372.

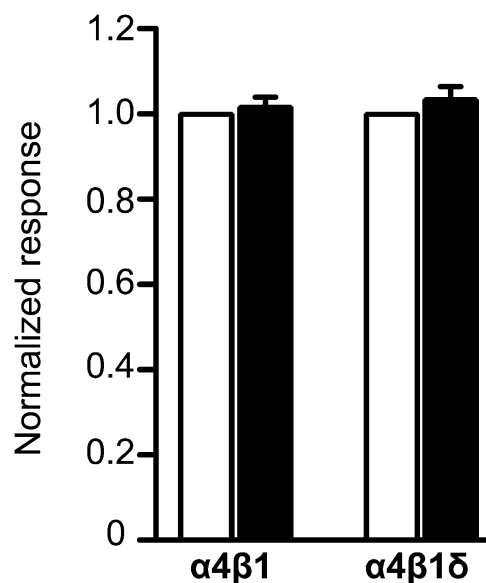

**Fig. S1.** Inability of GHB to antagonize the GABA response at  $\alpha 4\beta 1$ - and  $\alpha 4\beta 1\delta$ -expressing oocytes. Normalized response of 1 mM GHB and 100 nM GABA (filled bars) and 100 nM GABA (open bars) compared with 100 nM GABA of oocytes injected with  $\alpha 4$  and  $\beta 1$  or  $\alpha 4$ ,  $\beta 1$ , and  $\delta$  GABA<sub>A</sub> receptor RNA. Based on reported GABA concentration response curves (1), 100 nM GABA corresponds to approximately 15% and 85% of the maximum responses for  $\alpha 4\beta 1$  and  $\alpha 4\beta 1\delta$ , respectively. The normalized responses (mean ± SEM) ( $I_{GHB + GABA}/I_{GABA}$ ) were  $1.02 \pm 0.02$  ( $\alpha 4\beta 1$ ;  $n = 7$ ,  $P = 0.54$ , Z test) and  $1.03 \pm 0.03$  ( $\alpha 4\beta 1\delta$ ;  $n = 7$ ,  $P = 0.28$ , Z test).

1. Karim N, et al. (2012) Low nanomolar GABA effects at extrasynaptic  $\alpha 4\beta 1/\beta 3\delta$  GABA<sub>A</sub> receptor subtypes indicate a different binding mode for GABA at these receptors. *Biochem Pharmacol*, 10.1016/j.bcp.2012.05.017.

**Table S1.** List of proteins identified from radiophotoaffinity-labeled GHB binding sites (related to Fig. 1 and further described in Dataset S1)

| Protein names                                                       | Gene names      | Molecular mass (kDa) | MS/MS counts |        |        |        | Upper and lower gel bands |
|---------------------------------------------------------------------|-----------------|----------------------|--------------|--------|--------|--------|---------------------------|
|                                                                     |                 |                      | 18 kDa       | 21 kDa | 28 kDa | 50 kDa |                           |
| Brain-specific angiogenesis inhibitor 1-associated protein 2        | Baiap2          | 59.65                | 4            | 3      | 5      | 10     | 28                        |
| Calcium/calmodulin-dependent protein kinase type II $\alpha$ -chain | Camk2a          | 55.35                | 64           | 46     | 55     | 47     | 41                        |
| 2',3'-cyclic-nucleotide 3'-phosphodiesterase                        | Cnp             | 47.27                | 42           | 28     | 40     | 23     | 58                        |
| GABA receptor subunit $\alpha$ -1                                   | Gabra1          | 51.75                | 5            | 2      | 7      | 7      | 9                         |
| GABA receptor subunit $\beta$ -1 and -2                             | Gabbrb1; Gabrb2 | 54.63                | 1            | 1      | 3      | 6      | 9                         |
| Glial fibrillary acidic protein                                     | Gfap            | 49.96                | 19           | 9      | 37     | 43     | 49                        |
| Guanine nucleotide binding protein G(i), $\alpha 2$ -subunit        | Gnai2           | 40.47                | 8            | 3      | 9      | 5      | 8                         |
| Guanine nucleotide binding protein G(o) subunit $\alpha$            | Gnao1           | 40.07                | 29           | 9      | 27     | 15     | 34                        |
| Neuroplastin                                                        | Nptn            | 43.93                | 3            | 3      | 4      | 10     | 15                        |
| Septin-5                                                            | Sept5           | 43.92                | 5            | 6      | 9      | 4      | 13                        |
| Excitatory amino acid transporter 1                                 | Slc1a3          | 59.62                | 22           | 8      | 30     | 28     | 27                        |
| 4F2 cell-surface antigen heavy chain                                | Slc3a2          | 58.07                | 6            | 3      | 2      | 2      | 8                         |
| Synaptotagmin-1                                                     | Syt1            | 47.42                | 21           | 7      | 24     | 16     | 17                        |

Proteins identified in all gel bands before and after limited proteolysis by proteinase K treatment.

**Table S2. Inhibitory affinity constants ( $K_i$  values) for GABA<sub>A</sub> receptor ligands in the [<sup>3</sup>H] (*E,R,S*)-(6,7,8,9-tetrahydro-5-hydroxy-5H-benzocyclohept-6-ylidene)acetic acid [<sup>3</sup>H]NCS-382 binding assay**

| Compound       | Concentration (μM) | $K_i$ ( $pK_i \pm$ SEM)                 | Structure |
|----------------|--------------------|-----------------------------------------|-----------|
| Bicuculline    | 100                | *                                       |           |
| Diazepam       | 100                | *                                       |           |
| Etomidate      | 100                | *                                       |           |
| GABA           | 100                | 2.1 mM ( $2.7 \pm 0.021$ ) <sup>†</sup> |           |
| Gabazine       | 100                | 15.6 μM ( $4.7 \pm 0.107$ )             |           |
| GHB            | 100                | 4.3 μM ( $5.4 \pm 0.041$ ) <sup>‡</sup> |           |
| Muscimol       | 100                | *                                       |           |
| Propofol       | 100                | *                                       |           |
| THIP/Gaboxadol | 100                | *                                       |           |
| Tracazolol     | 30                 | *                                       |           |
| Valerenic acid | 100                | *                                       |           |

\*Data from two independent experiments performed in triplicate showed no significant difference from control (one-way ANOVA; posttest Dunnett).

<sup>†</sup>Concentration inhibition curve was fitted to the value of nonspecific binding (1 mM GHB).

<sup>‡</sup>Modified from ref. 1.

- Wellendorph P, Høg S, Skonberg C, Bräuner-Osborne H (2009) Phenylacetic acids and the structurally related non-steroidal anti-inflammatory drug diclofenac bind to specific  $\gamma$ -hydroxybutyric acid sites in rat brain. *Fundam Clin Pharmacol* 23:207–213.

## Other Supporting Information Files

[Dataset S1 \(XLSX\)](#)
